# Supplementary material for: Theranostic potential of self-luminescent branched polyethyleneimine-coated superparamagnetic iron oxide nanoparticles
Source: publisher site journal article supplement (doi:10.3762/bjnano.13.6), 2022-01-18
Supplement: Additional file 1 [file 2190-4286-13-6-S1.pdf]

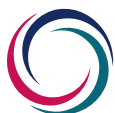

## Supporting Information

for

### **Theranostic potential of self-luminescent branched polyethyleneimine-coated superparamagnetic iron oxide nanoparticles**

Rouhollah Khodadust, Ozlem Unal and Havva Yagci Acar

*Beilstein J. Nanotechnol.* **2022**, *13*, 82–95. [doi:10.3762/bjnano.13.6](https://doi.org/10.3762/bjnano.13.6)

**Supporting Information contains dynamic light scattering (DLS), photoluminescence spectra, and zeta potential analysis of SPION@bPEI, SPION@bPEI/pDNA, SPION@bPEI-Erb, SPION @bPEI-Erb/pDNA, and SPION@bPEI-Erb/pDNA**

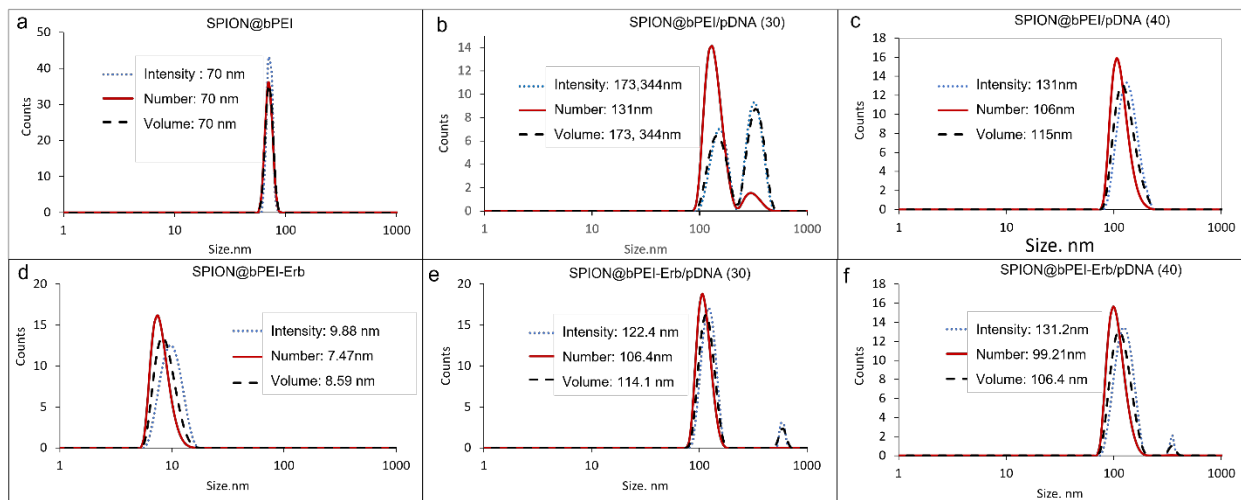

**Figure S1:** Panels (a–f) demonstrate the size of SPION@bPEI, SPION@bPEI/pDNA(30), SPION@bPEI/pDNA(40), SPION@bPEI-Erb, SPION @bPEI-Erb/pDNA(30), and SPION@bPEI-Erb/pDNA(40) complex, respectively. The size of nanoparticles is represented in all three forms as intensity, number, and volume. The numbers (30) and (40) represent the N/P ratios.

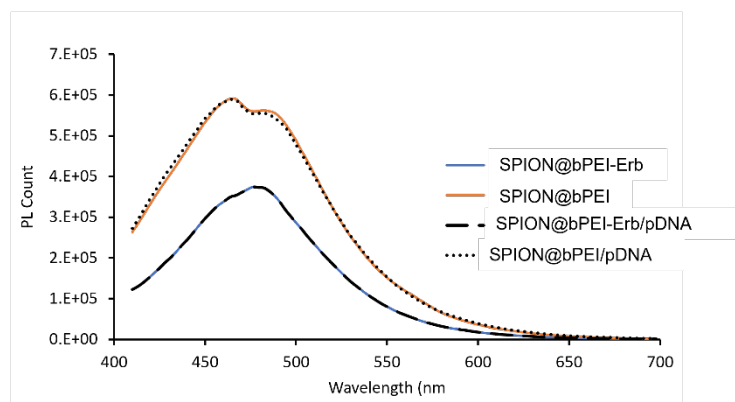

**Figure S2:** Photoluminescence spectra of SPION@bPEI and SPION@bPEI-Erb before and after plasmid DNA loading (SPION@bPEI/pDNA and SPION@bPEI-Erb/pDNA).

**Table S1:** Zeta potential of SPION@bPEI, SPION@bPEI/pDNA(30), SPION@bPEI/pDNA(40), SPION@bPEI-Erb, SPION@bPEI-Erb/pDNA(30), and SPION@bPEI-Erb/pDNA(40) complex.

| <b>Sample</b>               | <b>Zeta Potential Values (mV)</b> |
|-----------------------------|-----------------------------------|
| SPION@bPEI                  | 35.2                              |
| SPION@bPEI/pDNA (N/P=30)    | 23.62                             |
| SPION@PEI/pDNA (N/P=40)     | 27.68                             |
| SPION@bPEI-Erb              | 29.1                              |
| SPION@bPEI-Erb/pDNA(N/P=30) | 21.6                              |
| SPION@bPEI-Erb/pDNA(N/P=40) | 25.89                             |
